# Supplementary material for: Spatiotemporal Analysis for COVID-19 Delta Variant Using GIS-Based Air Parameter and Spatial Modeling
Source: MDPI journal article supplement (doi:10.3390/ijerph19031614), 2022-01-30
Supplement: s1 [file s1]

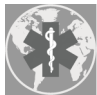

Supplementary Materials:

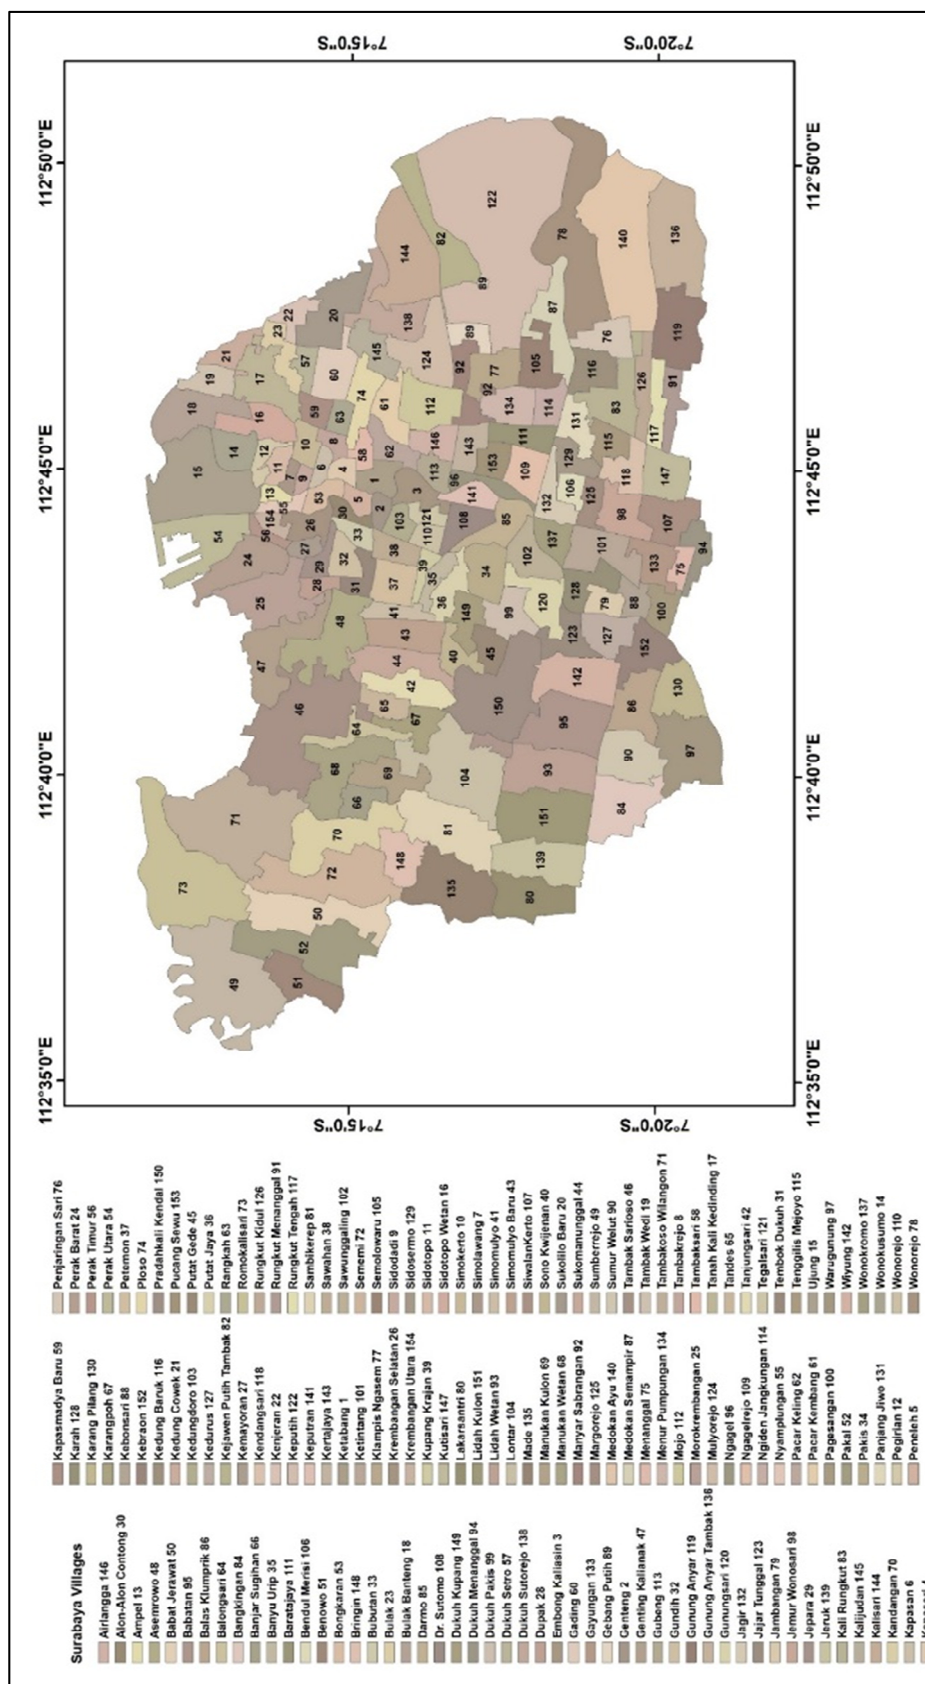

Figure S1. Village's Administration of Surabaya as study area.

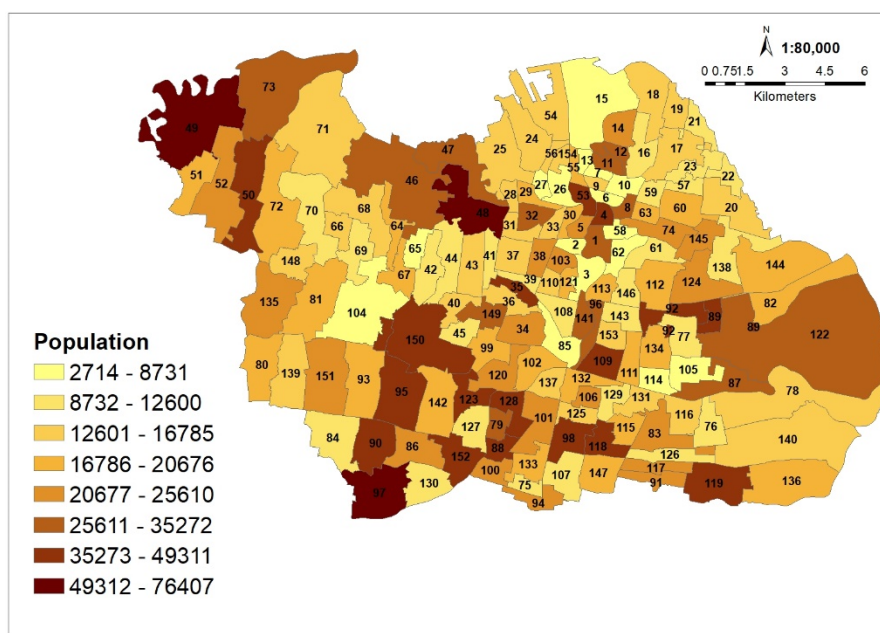

(a)

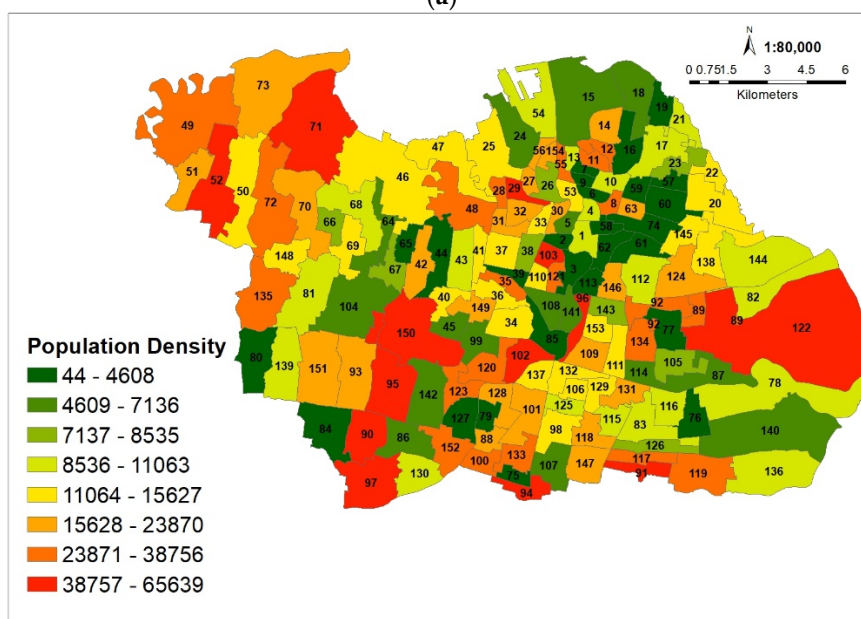

(b)

**Figure S2.** Population Distribution of Surabaya on 2020 (a) Population Distribution of Each Village (b) Distribution of Population Density (population/km<sup>2</sup>) of Each Village.

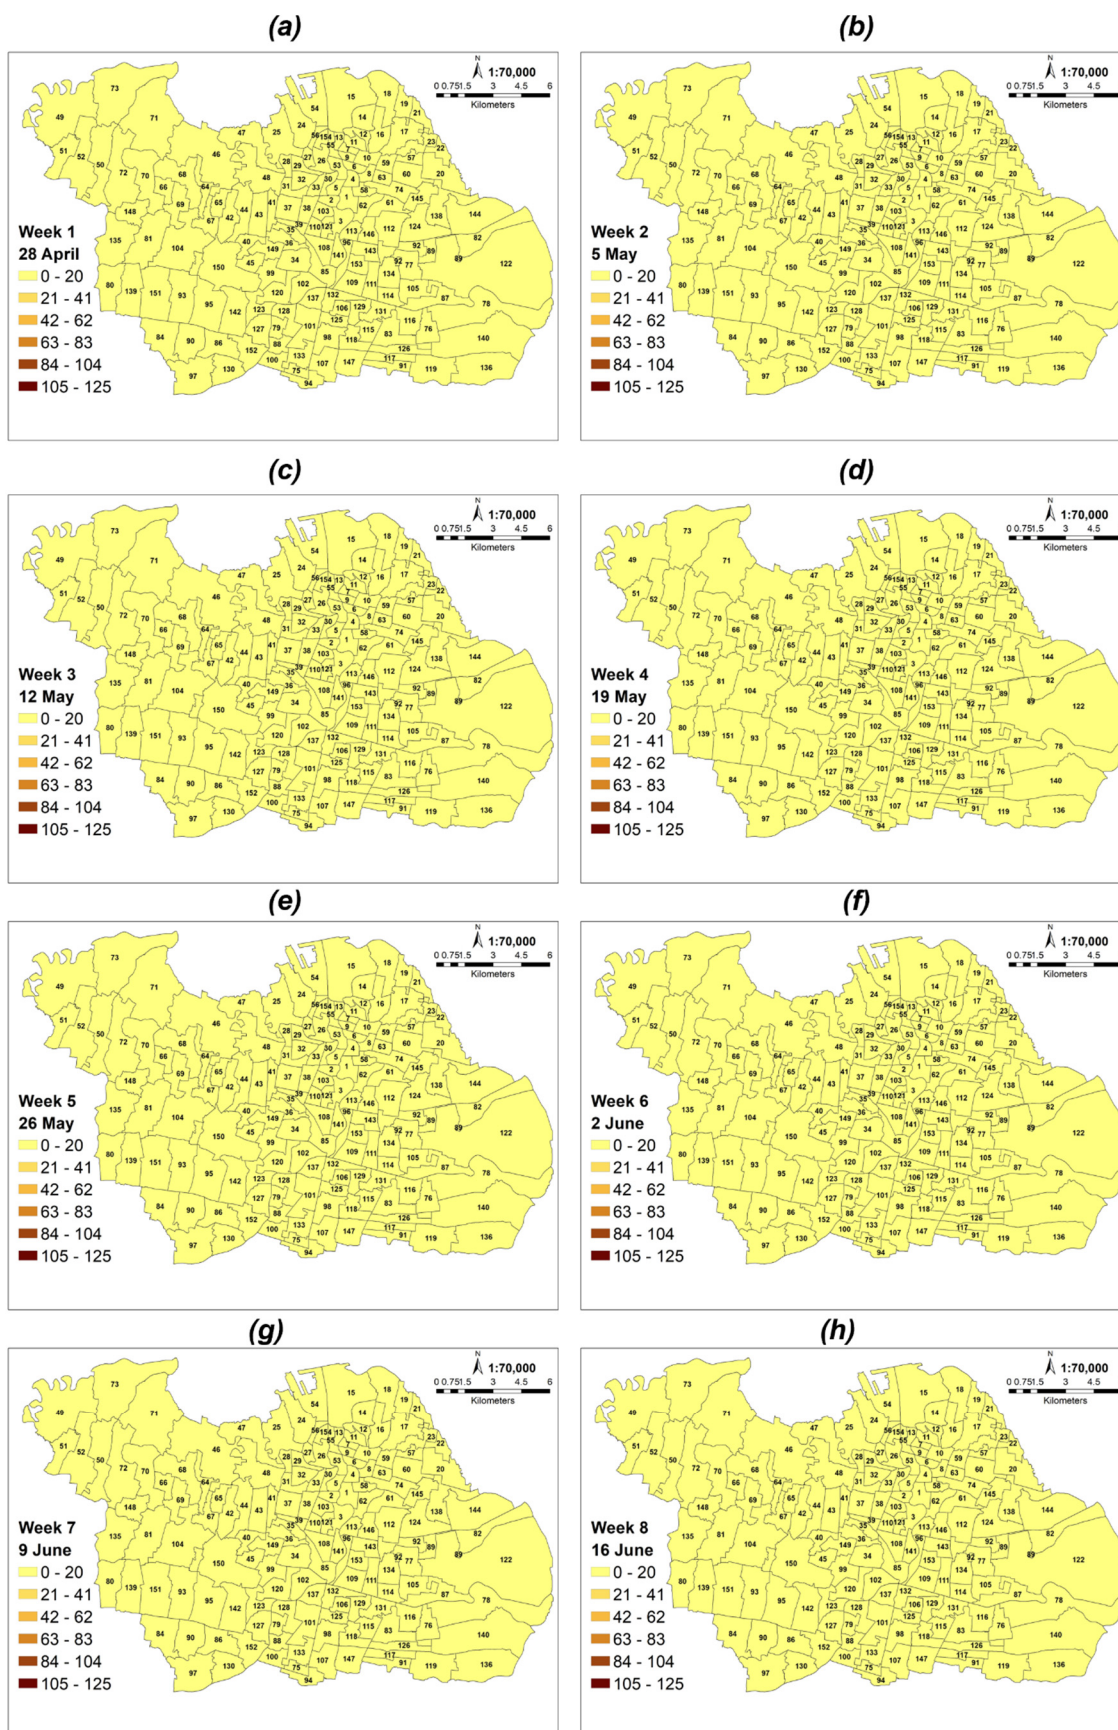



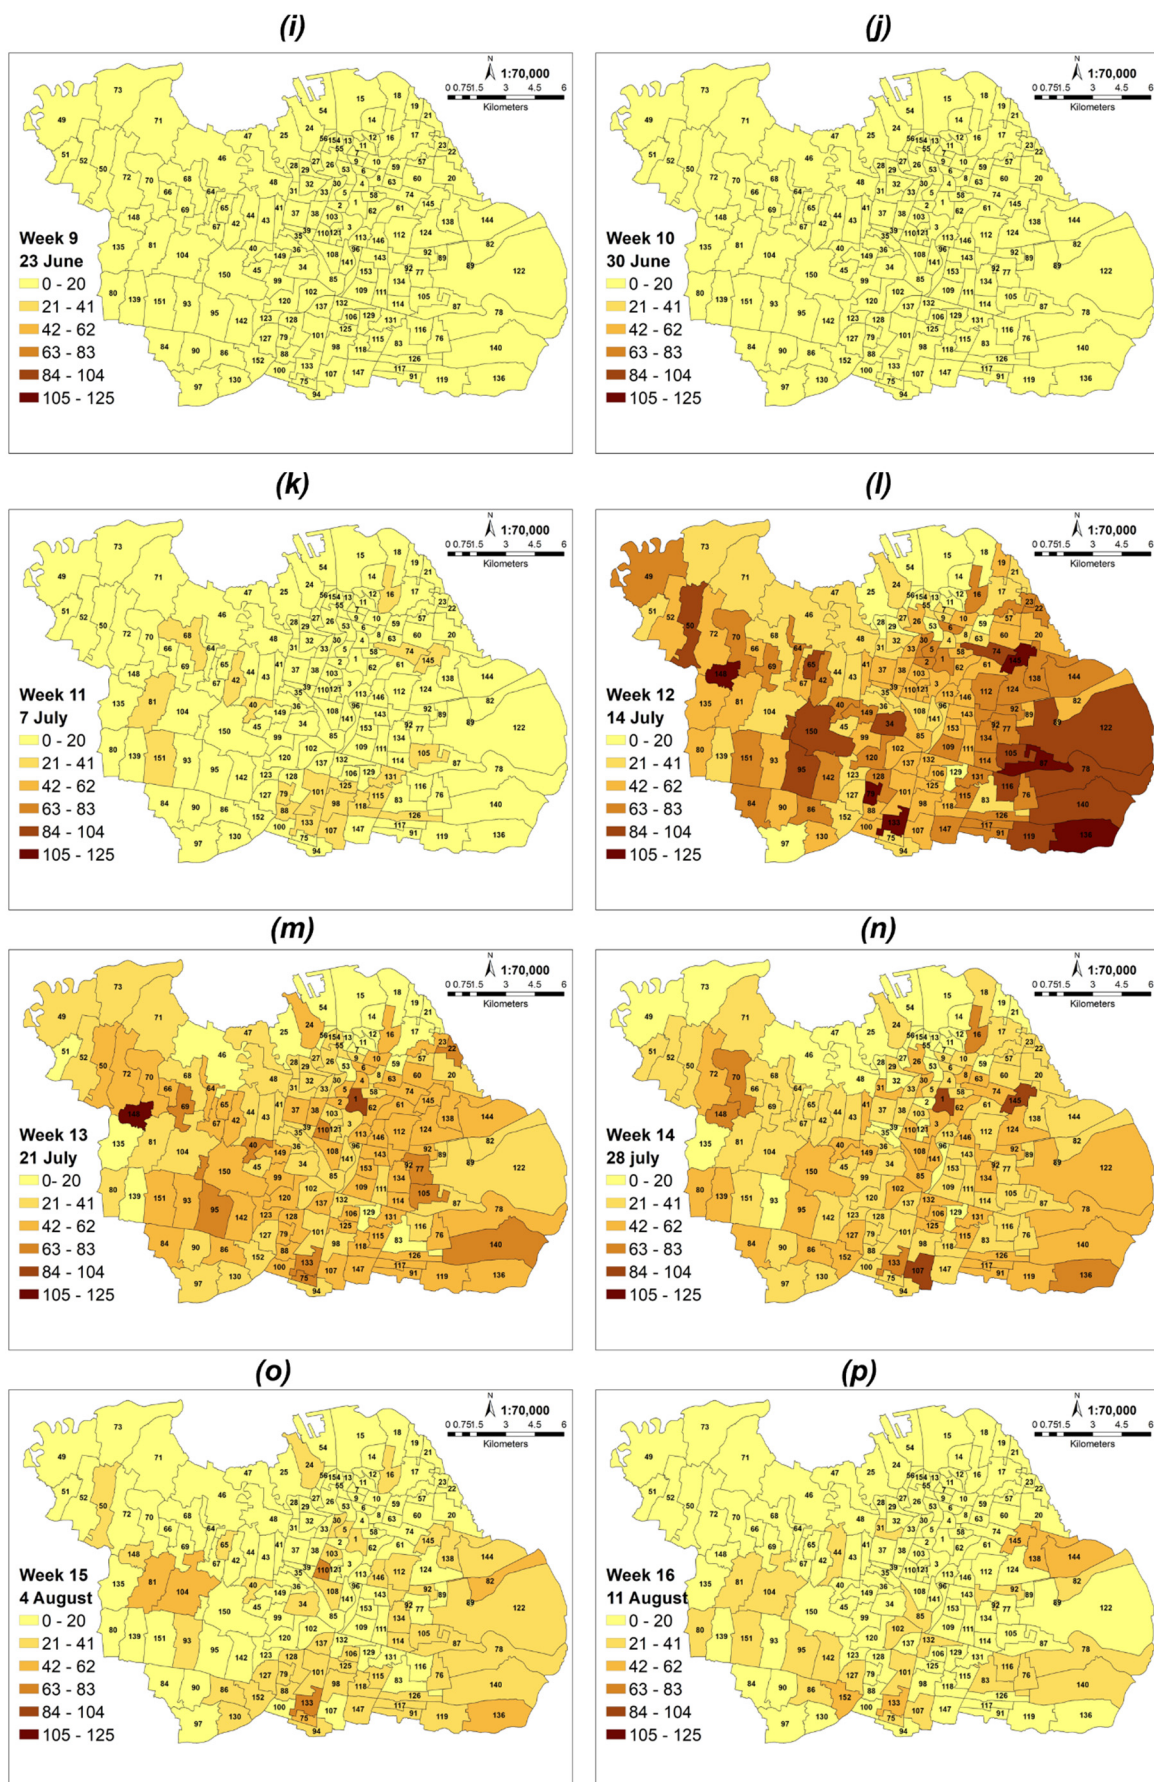



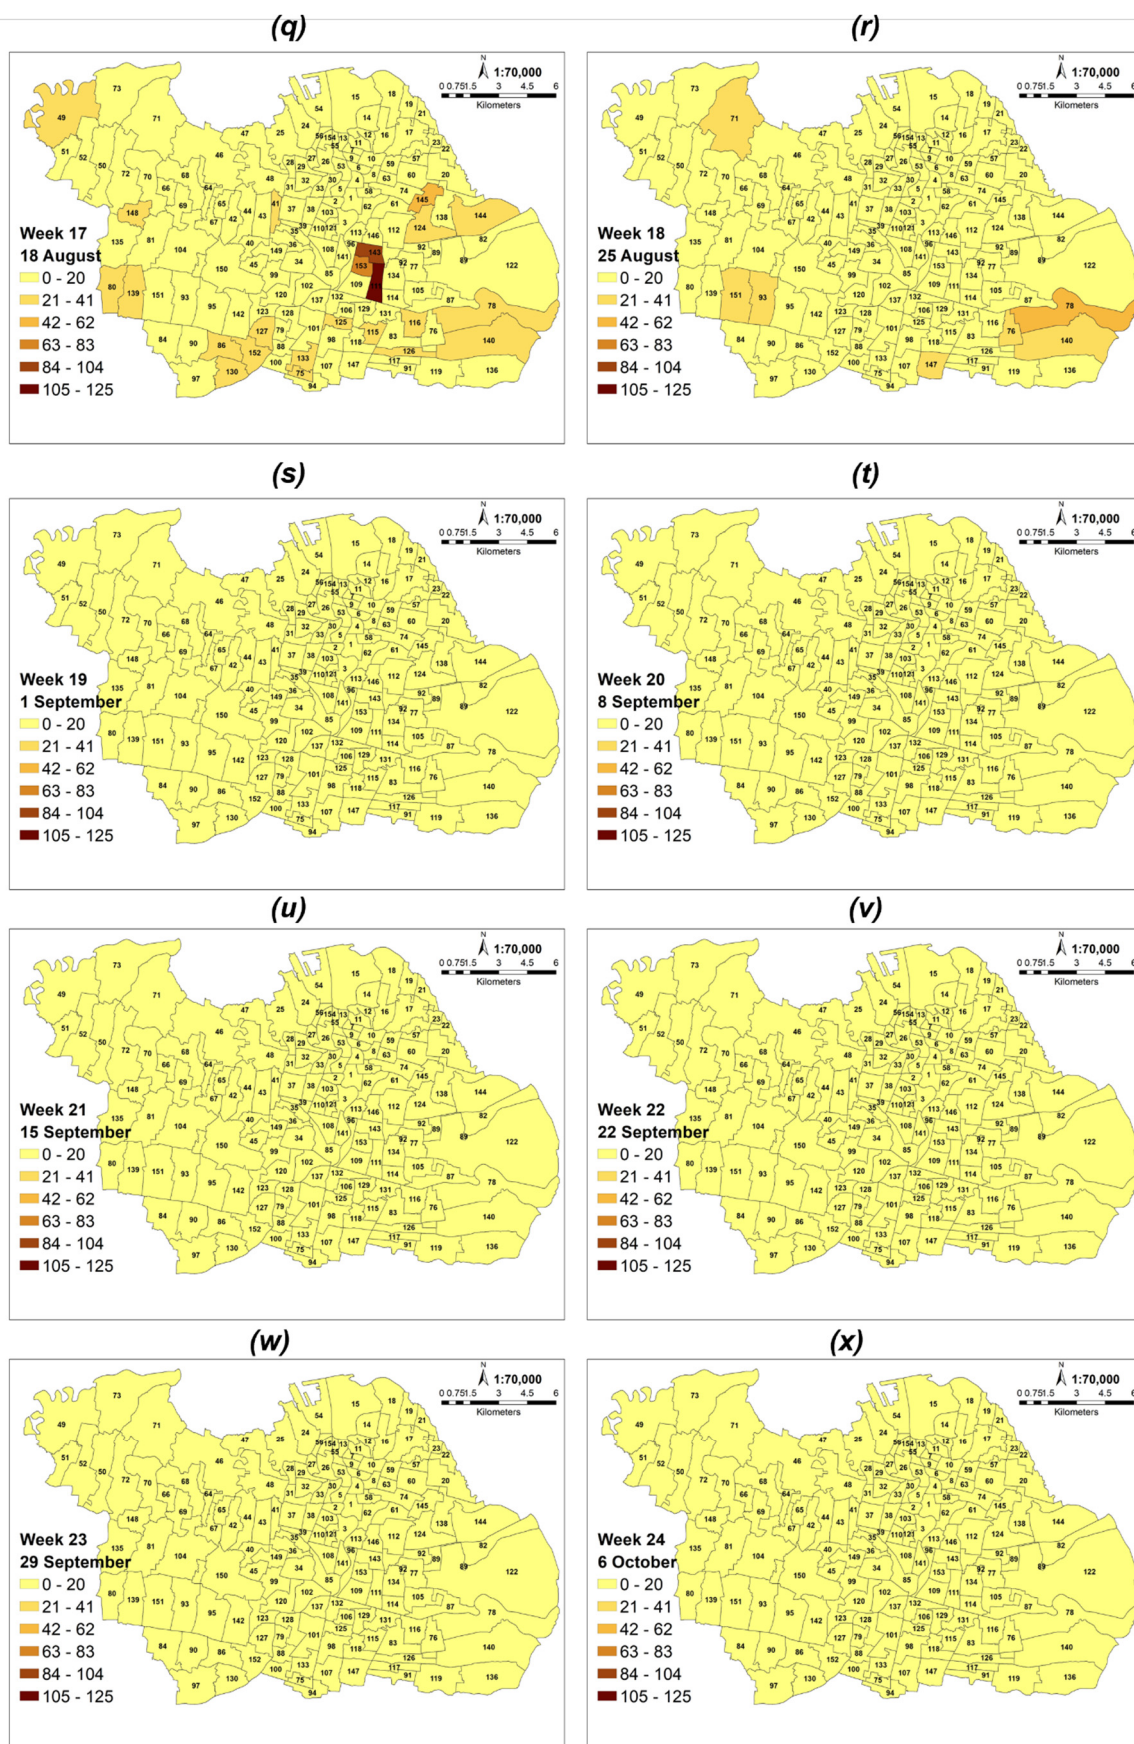

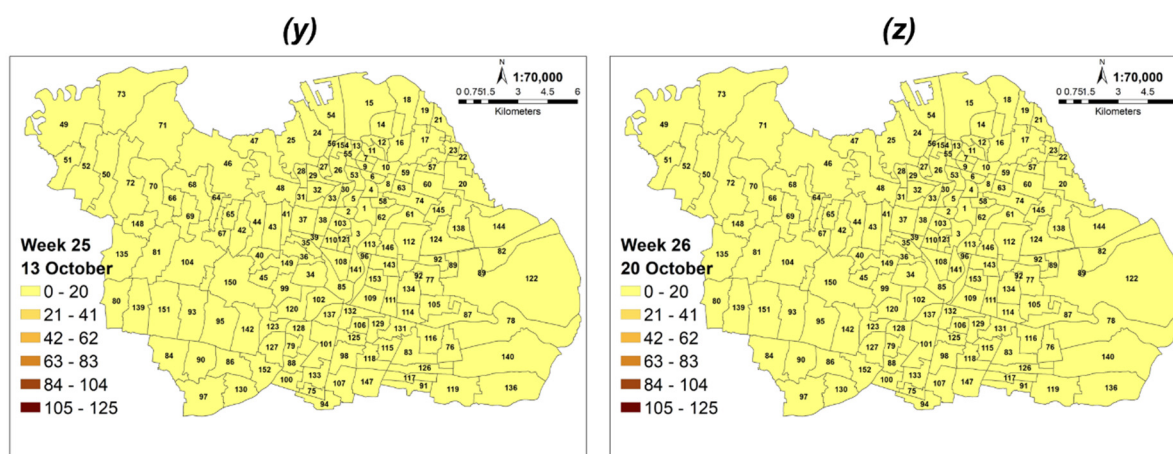

**Figure S3.** The distribution of confirmed COVID-19 cases per 100,000 populations every week in Surabaya. (a) 1<sup>st</sup> Week (28 April 2021 – 4 May 2021); (b) 2<sup>nd</sup> Week (5 May 2021 – 11 May 2021); (c) 3<sup>rd</sup> Week (12 May 2021 – 19 May 2021); (d) 4<sup>th</sup> Week (20 May 2021 – 25 May 2021); (e) 5<sup>th</sup> Week (26 May 2021 – 1 June 2021); (f) 6<sup>th</sup> Week (2 June 2021 – 8 June 2021); (g) 7<sup>th</sup> Week (9 June 2021 – 15 June 2021); (h) 8<sup>th</sup> Week (16 June 2021 – 22 June 2021); (i) 9<sup>th</sup> Week (23 June 2021 – 29 June 2021); (j) 10<sup>th</sup> Week (30 June 2021 – 6 July 2021); (k) 11<sup>th</sup> Week (7 July 2021 – 13 July 2021); (l) 12<sup>th</sup> Week (14 July 2021 – 20 July 2021); (m) Week 13 (21 July 2021 – 27 July 2021); (n) Week 14 (28 July 2021 – 3 August 2021); (o) 15<sup>th</sup> Week (4 August 2021 – 10 August 2021); (p) 16<sup>th</sup> Week (11 August 2021 – 17 August 2021); (q) 17<sup>th</sup> Week (18 August 2021 – 24 August 2021); (r) 18<sup>th</sup> Week (25 August 2021 – 31 August 2021); (s) 19<sup>th</sup> Week (1 September 2021 – 7 September 2021); (t) 20<sup>th</sup> Week (8 September 2021 – 14 September 2021); (u) 21<sup>st</sup> Week (15 September 2021 – 21 September 2021); (v) 22<sup>nd</sup> Week (22 September 2021 – 28 September 2021); (w) 23<sup>rd</sup> Week (29 September 2021 – 5 October 2021); (x) 24<sup>th</sup> Week (4 October 2021 – 12 October 2021); (y) 25<sup>th</sup> Week (13 October 2021 – 19 October 2021); (z) 26<sup>th</sup> Week (20 October 2021 – 26 October 2021).



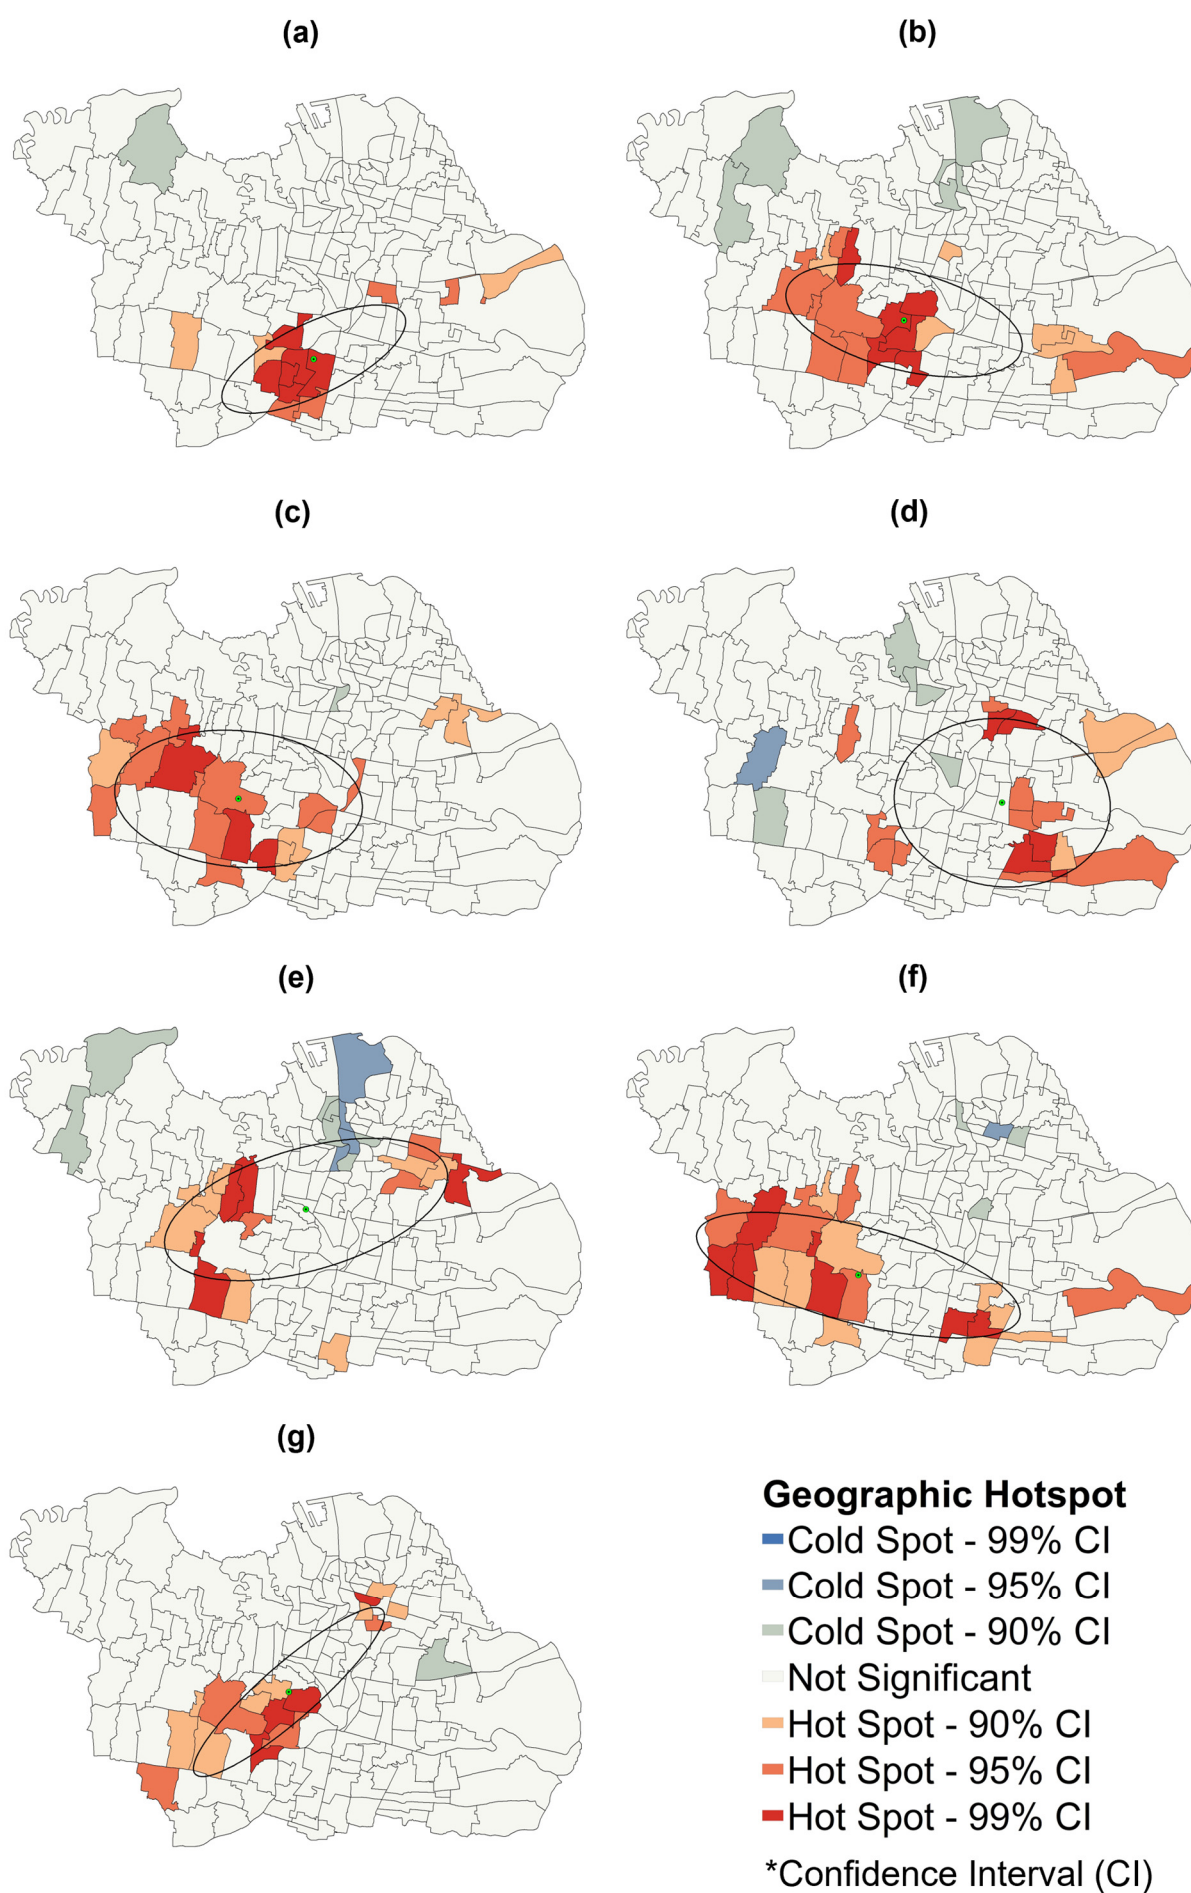

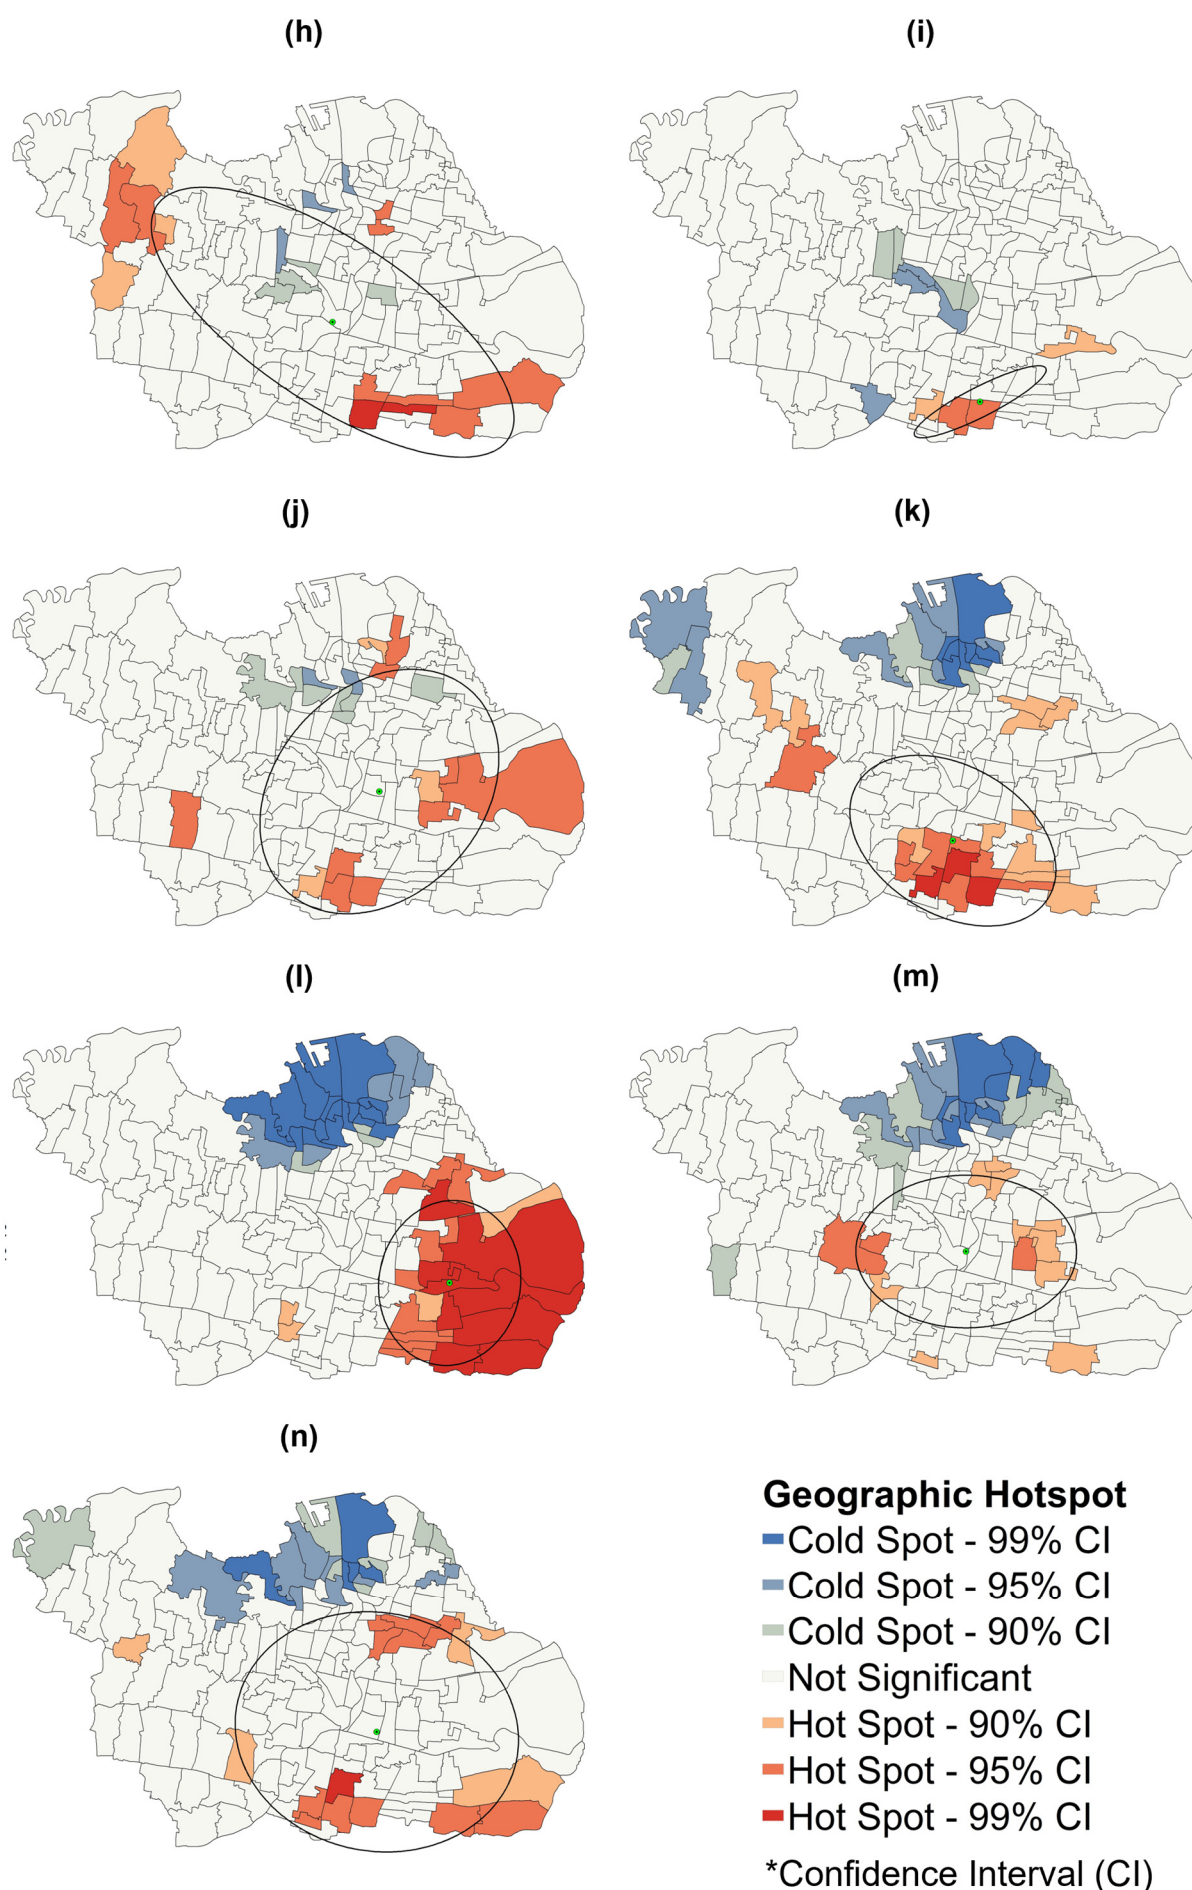



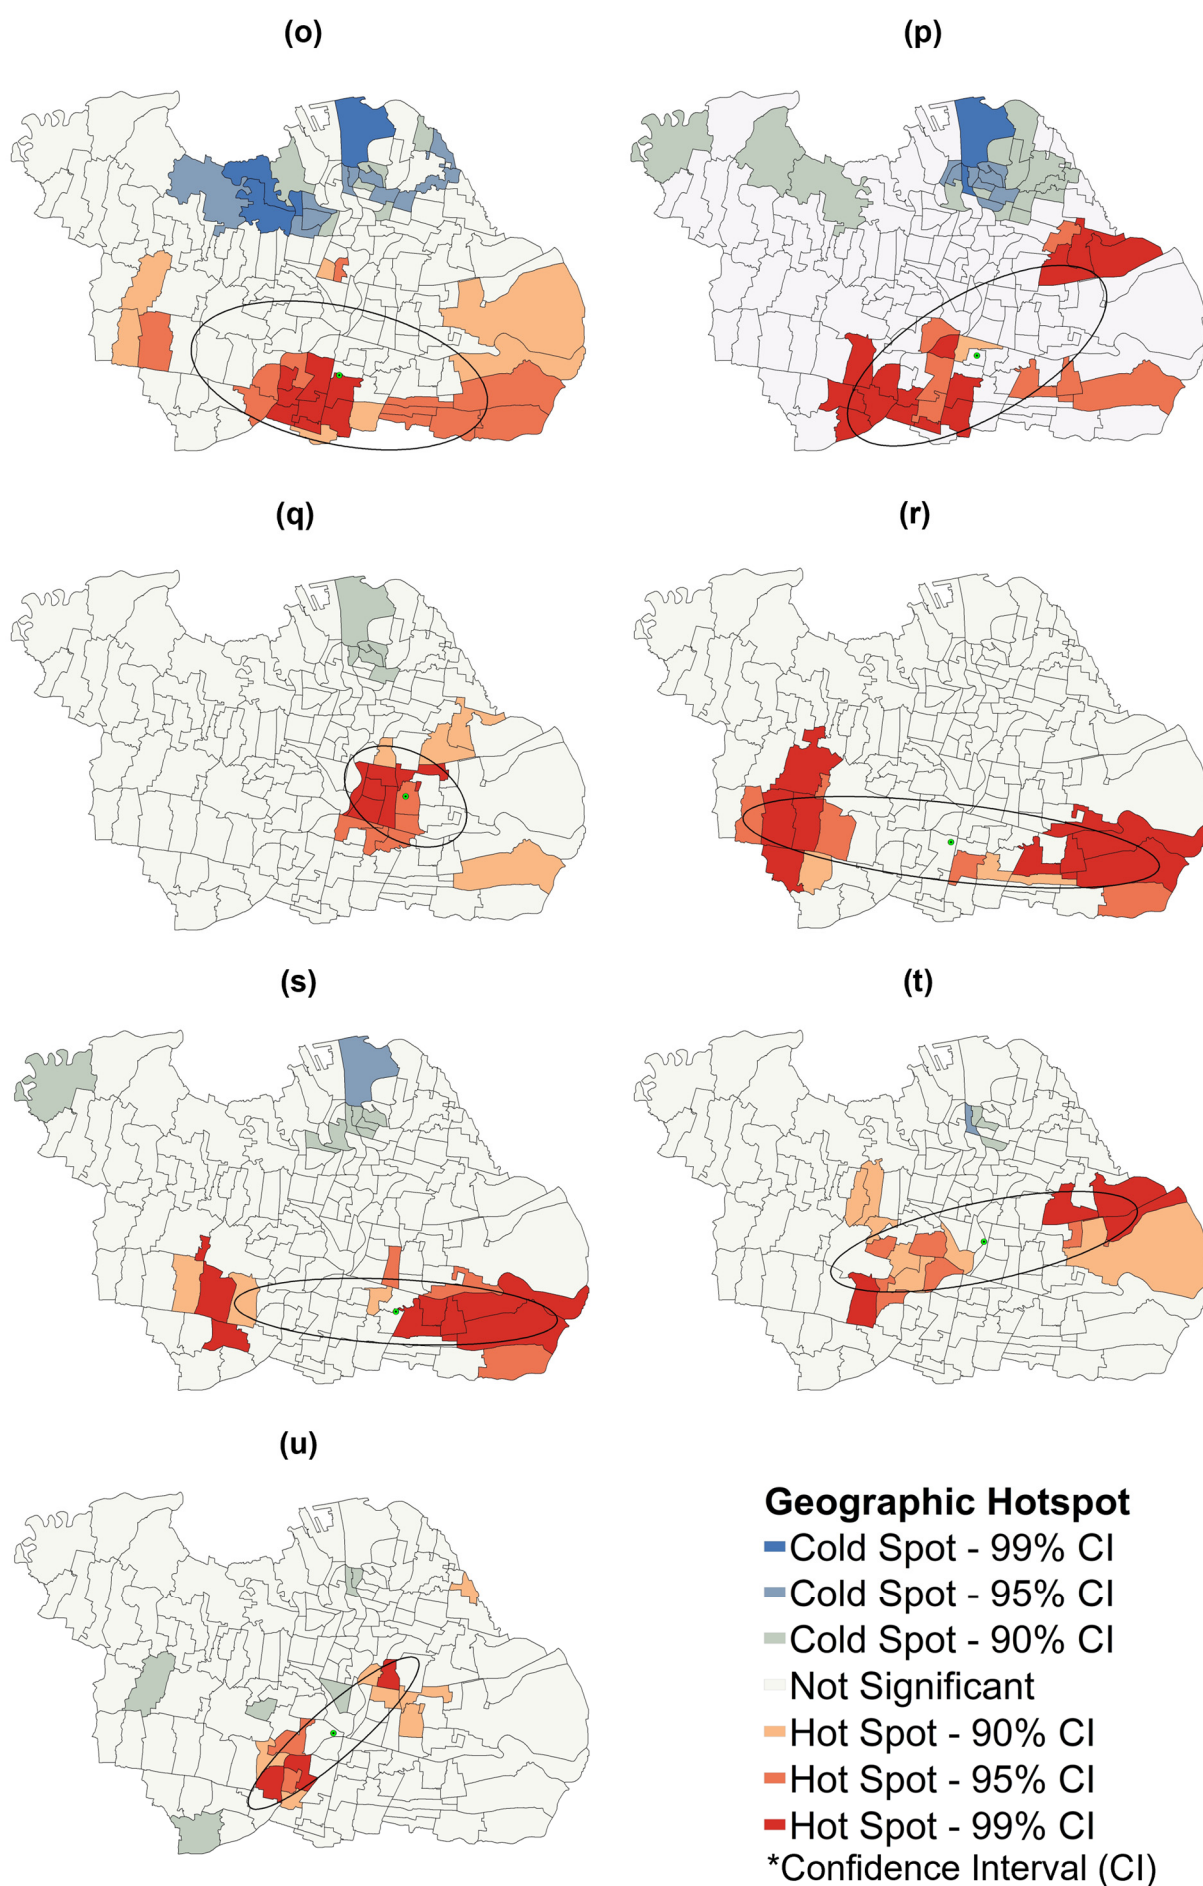

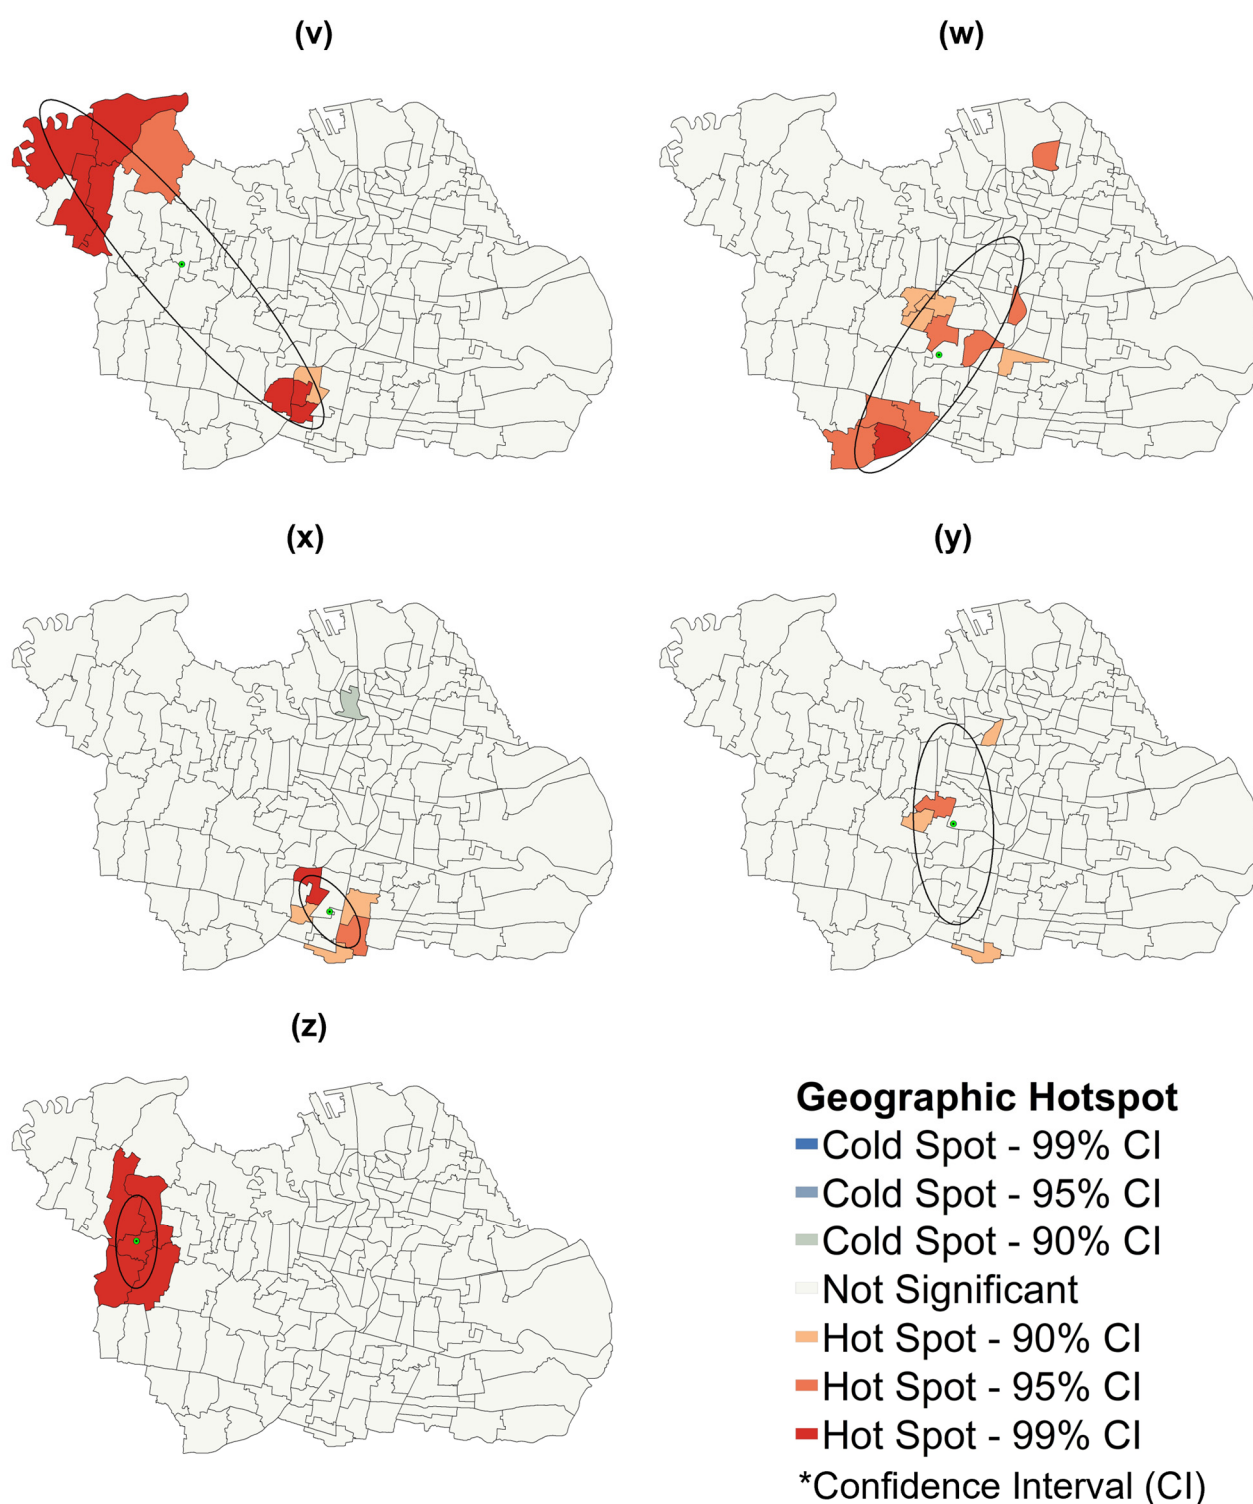

**Figure S4.** The clustering map of Covid-19 incidence along with its orientation and shift directions. (a) 1<sup>st</sup> Week (28 April 2021 – 4 May 2021); (b) 2<sup>nd</sup> Week (5 May 2021 – 11 May 2021); (c) 3<sup>rd</sup> Week (12 May 2021 – 19 May 2021); (d) 4<sup>th</sup> Week (20 May 2021 – 25 May 2021); (e) 5<sup>th</sup> Week (26 May 2021 – 1 June 2021); (f) 6<sup>th</sup> Week (2 June 2021 – 8 June 2021); (g) 7<sup>th</sup> Week (9 June 2021 – 15 June 2021); (h) 8<sup>th</sup> Week (16 June 2021 – 22 June 2021); (i) 9<sup>th</sup> Week (23 June 2021 – 29 June 2021); (j) 10<sup>th</sup> Week (30 June 2021 – 6 July 2021); (k) 11<sup>th</sup> Week (7 July 2021 – 13 July 2021); (l) 12<sup>th</sup> Week (14 July 2021 – 20 July 2021); (m) Week 13 (21 July 2021 – 27 July 2021); (n) Week 14 (28 July 2021 – 3 August 2021); (o) 15<sup>th</sup> Week (4 August 2021 – 10 August 2021); (p) 16<sup>th</sup> Week (11 August 2021 – 17 August 2021); (q) 17<sup>th</sup> Week (18 August 2021 – 24 August 2021); (r) 18<sup>th</sup> Week (25 August 2021 – 31 August 2021); (s) 19<sup>th</sup> Week (1 September 2021 – 7 September 2021); (t) 20<sup>th</sup> Week (8 September 2021 – 14 September 2021);



(u) 21<sup>st</sup> Week (15 September 2021 – 21 September 2021); (v) 22<sup>nd</sup> Week (22 September 2021 – 28 September 2021); (w) 23<sup>rd</sup> Week (29 September 2021 – 5 October 2021); (x) 24<sup>th</sup> Week (4 October 2021 – 12 October 2021); (y) 25<sup>th</sup> Week (13 October 2021 – 19 October 2021); (z) 26<sup>th</sup> Week (20 October 2021 – 26 October 2021).

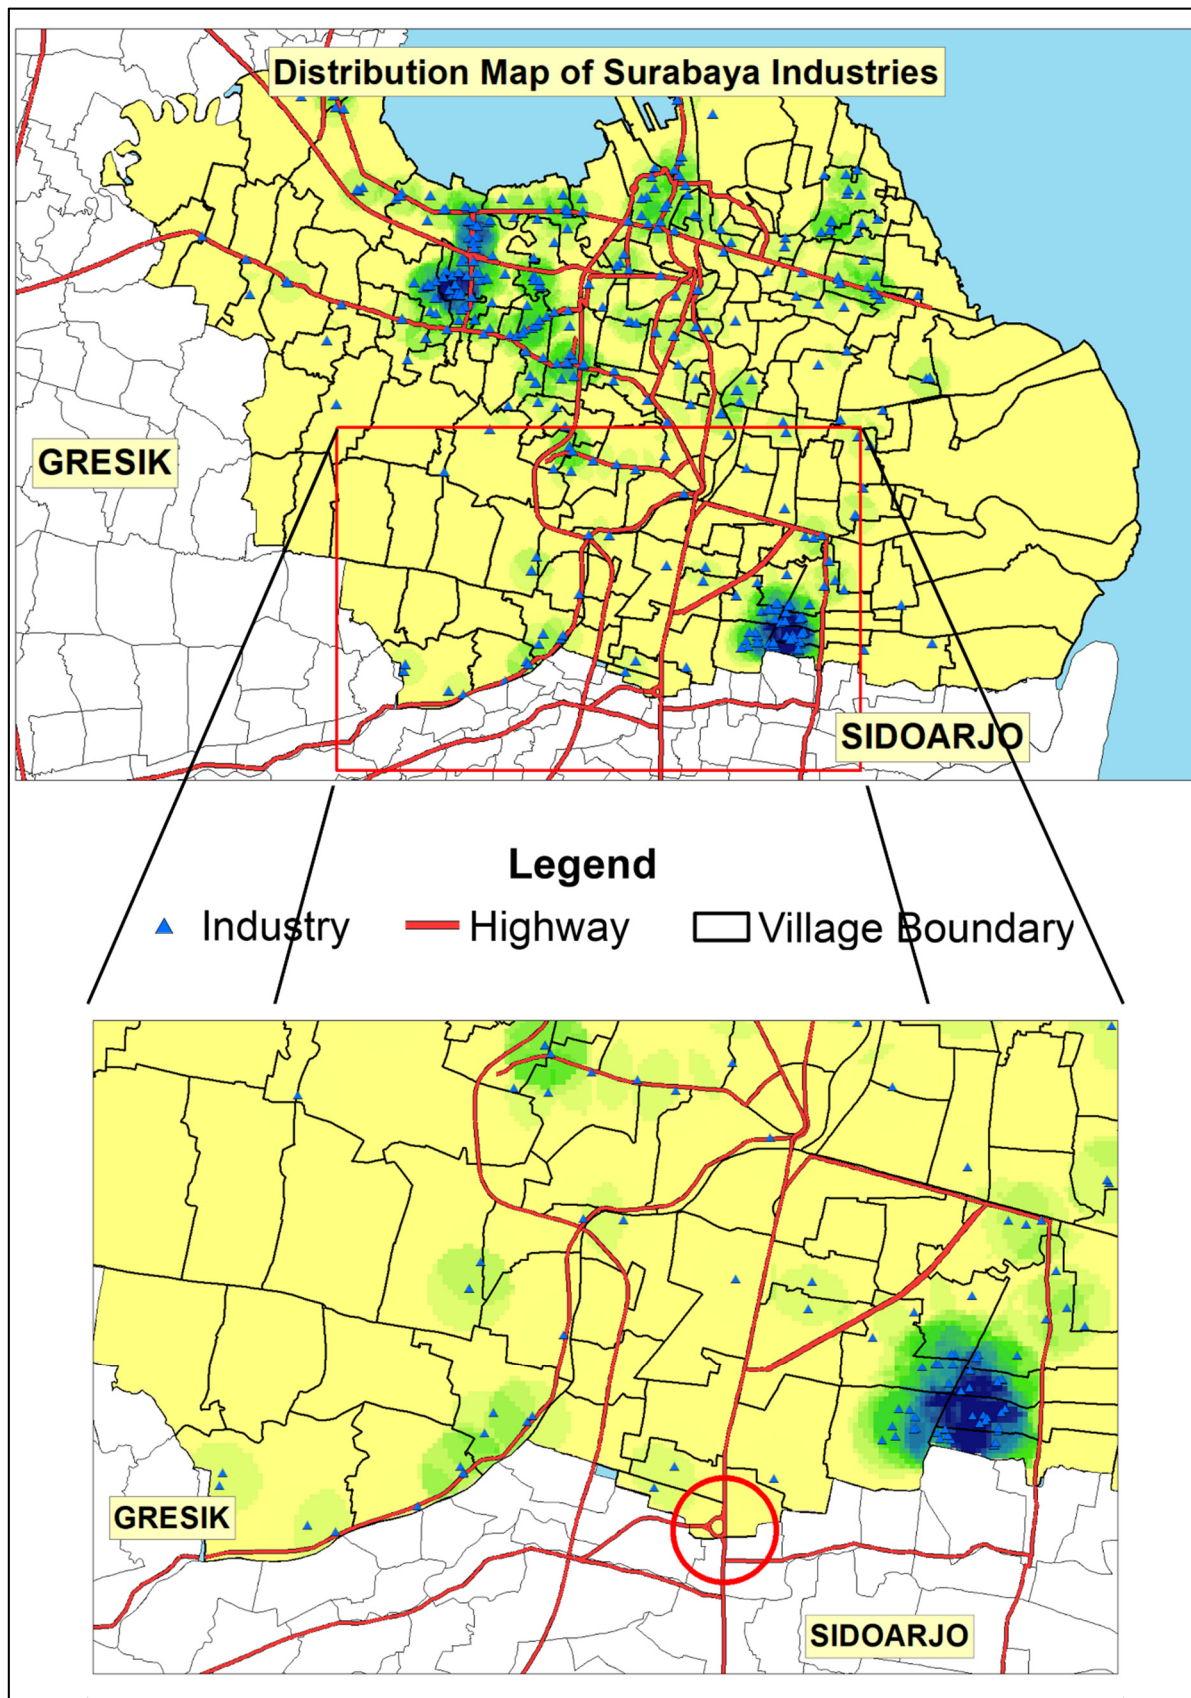

**Figure S5.** Distribution map of Surabaya Industries. The red circle (bottom) is called the Gerbangkertosusilo area. It is the entrance area to the Surabaya and the surrounding area, includes Gresik–Bangkalan–Mojokerto–Surabaya–Sidoarjo–Lamongan.

**Table S1.** Location of Weighted Mean Center (WMC).

| Week | Date                                  | Coordinat X (m) | Coordinat Y (m) | WMC (Village)     |
|------|---------------------------------------|-----------------|-----------------|-------------------|
| 1    | 28 April 2021 – 4 May 2021            | 690491.505      | 9191371.709     | Ketintang         |
| 2    | 5 May 2021 – 11 May 2021              | 689363.660      | 9193374.052     | Dukuh Pakis       |
| 3    | 12 May 2021 – 19 May 2021             | 686970.804      | 9193297.146     | Pradahkali Kendal |
| 4    | 20 May 2021 – 25 May 2021             | 694193.433      | 9193105.752     | Baratajaya        |
| 5    | 26 May 2021 – 1 June 2021             | 690289.795      | 9195714.877     | Banyu Urip        |
| 6    | 2 June 2021 – 8 June 2021             | 687118.472      | 9192483.670     | Wiyung            |
| 7    | 9 June 2021 – 15 June 2021            | 689446.500      | 9194591.563     | Dukuh Kupang      |
| 8    | 16 June 2021 – 22 June 2021           | 691448.149      | 9193282.331     | Darmo             |
| 9    | 23 June 2021 – 29 June 2021           | 692959.379      | 9189365.370     | Kutisari          |
| 10   | 30 June 2021 – 6 July 2021            | 693748.499      | 9193659.268     | Pucang Sewu       |
| 11   | 7 July 2021 – 13 July 2021            | 691619.805      | 9191239.394     | Margorejo         |
| 12   | 14 July 2021 – 20 July 2021           | 697205.301      | 9192097.089     | Medokan Semampir  |
| 13   | 21 July 2021 – 27 July 2021           | 692271.624      | 9193645.441     | Darmo             |
| 14   | 28 July 2021 – 3 August 2021          | 693622.804      | 9192651.546     | Ngagelrejo        |
| 15   | 4 August 2021 – 10 August 2021        | 691793.009      | 9190756.498     | Jemur Wonoasri    |
| 16   | 11 August 2021 – 17 August 2021       | 692674.419      | 9191722.292     | Bendul Merisi     |
| 17   | 18 August 2021 – 24 August 2021       | 695039.162      | 9193606.229     | Menur Pumpungan   |
| 18   | 25 August 2021 – 31 August 2021       | 691228.659      | 9191270.241     | Ketintang         |
| 19   | 1 September 2021 – 7 September 2021   | 694389.574      | 9190909.745     | Tenggilis Mejoyo  |
| 20   | 8 September 2021 – 14 September 2021  | 692841.732      | 9194333.037     | Keputran          |
| 21   | 15 September 2021 – 21 September 2021 | 691338.223      | 9192912.292     | Sawunggaling      |
| 22   | 22 September 2021 – 28 September 2021 | 683675.753      | 9196653.623     | Manukan Kulon     |



---

|    |                                       |            |             |            |
|----|---------------------------------------|------------|-------------|------------|
| 23 | 29 September 2021 – 5<br>October 2021 | 688798.646 | 9192411.546 | Gunungsari |
| 24 | 4 October 2021 – 12<br>October 2021   | 690597.087 | 9189792.971 | Ketintang  |
| 25 | 13 October 2021 – 19<br>October 2021  | 689467.776 | 9193904.644 | Pakis      |
| 26 | 20 October 2021 – 26<br>October 2021  | 681552.383 | 9196934.499 | Bringin    |

---
